# Supplementary material
Source: publisher figshare collection journal article supplement (https://sage.figshare.com/ndownloader/files/14860184)
Supplement: Supplementary file 1 [file 14860184]

Table 3 Supplement. *Descriptive analysis results*

| Variable                    | Measure                                                                               | Data                                  | Mean  | Standard deviation | Min.   | Max.   |
|-----------------------------|---------------------------------------------------------------------------------------|---------------------------------------|-------|--------------------|--------|--------|
| Revenue indicator           | Total general fund revenues/population (\$, ln, $t$ )                                 | GFOA (2005-2011)                      | 6.66  | 0.60               | -0.36  | 9.08   |
| Dependency indicator        | Total general fund intergovernmental aid/total general fund revenues (% , ln, $t$ )   |                                       | 1.63  | 1.99               | -6.90  | 4.32   |
| Expenditure indicator       | Total general fund expenditures/population (\$, ln, $t$ )                             |                                       | 6.64  | 0.58               | -0.34  | 8.98   |
| Fund balance position       | Total general fund balances/total general fund expenditures (% , $t$ )                |                                       | 24.24 | 25.24              | -24.63 | 395.45 |
| GO debt indicator           | Total outstanding GO debt/population (\$ , square rooted, $t$ )                       |                                       | 20.87 | 15.84              | 0      | 93.66  |
| Rule composite 1            | Tax (revenue) limits only (reference group, $t-I$ )                                   | Self-collected data                   | 0.10  | 0.30               | 0      | 1      |
| Rule composite 2            | Tax (revenue) limits and BBRs ( $t-I$ )                                               |                                       | 0.07  | 0.25               | 0      | 1      |
| Rule composite 3            | Tax (revenue) limits and DLs ( $t-I$ )                                                |                                       | 0.26  | 0.44               | 0      | 1      |
| Rule composite 4            | Tax (revenue) limits, BBRs, and DLs ( $t-I$ )                                         |                                       | 0.30  | 0.45               | 0      | 1      |
| Rule composite 5            | Tax (revenue) limits, expenditure limits, and DL ( $t-I$ )                            |                                       | 0.13  | 0.34               | 0      | 1      |
| Rule composite 6            | All four rules ( $t-I$ )                                                              | U.S. Bureau of the Census (2006-2011) | 0.05  | 0.23               | 0      | 1      |
| Rule composite 7            | DLs only ( $t-I$ )                                                                    |                                       | 0.06  | 0.24               | 0      | 1      |
| Population                  | Total population (ln, $t$ )                                                           |                                       | 11.31 | 0.90               | 9.77   | 15.94  |
| Household median income     | Dollar amount of household median income (ln, $t$ )                                   |                                       | 10.90 | 0.33               | 9.69   | 12.22  |
| Unemployment rate           | Unemployed population/population in labor force (ln, $t$ )                            |                                       | 1.93  | 0.37               | 0.47   | 3.26   |
| Aging population rate       | Population aged 65+/population (% , $t$ )                                             | U.S. Bureau of the Census (2005-2010) | 11.60 | 4.03               | 1.43   | 56.54  |
| Educational attainment rate | Population with bachelor degree or higher/population aged 25+ (% , $t$ )              |                                       | 31.46 | 13.54              | 9.50   | 78.70  |
| Non-white population rate   | Non-white population/population (ln, $t$ )                                            |                                       | 3.10  | 0.63               | 1.06   | 4.42   |
| Police function             | Police function in current operating expenditures: 1 Otherwise: 0 ( $t-I$ )           |                                       | 0.98  | 0.13               | 0      | 1      |
| Fire protection function    | Fire function in current operating expenditures: 1 Otherwise: 0 ( $t-I$ )             |                                       | 0.91  | 0.28               | 0      | 1      |
| Revenue diversification     | The Herfindahl-Hirschman index (point, $t-I$ )                                        | GFOA (2005-2011)                      | 0.69  | 0.07               | 0.09   | 0.81   |
| Lagged dependency indicator | Total general fund intergovernmental aid/total general fund revenues (% , ln, $t-I$ ) |                                       | 1.60  | 2.23               | -9.21  | 4.32   |
| N                           |                                                                                       | 3,183                                 |       |                    |        |        |

Note 1. All fiscal and incomes variables are adjusted for inflation (Base year: 2012).
